# Supplementary material for: Autophagy induction by SIRT6 is involved in oxidative stress-induced neuronal damage
Source: PubMed Central journal article supplement (PMC4818841; doi:10.1007/s13238-016-0257-6), 2016-03-16
Supplement: 13238_2016_257_MOESM1_ESM.pdf [file 13238_2016_257_MOESM1_ESM.pdf]

## Supplementary Information

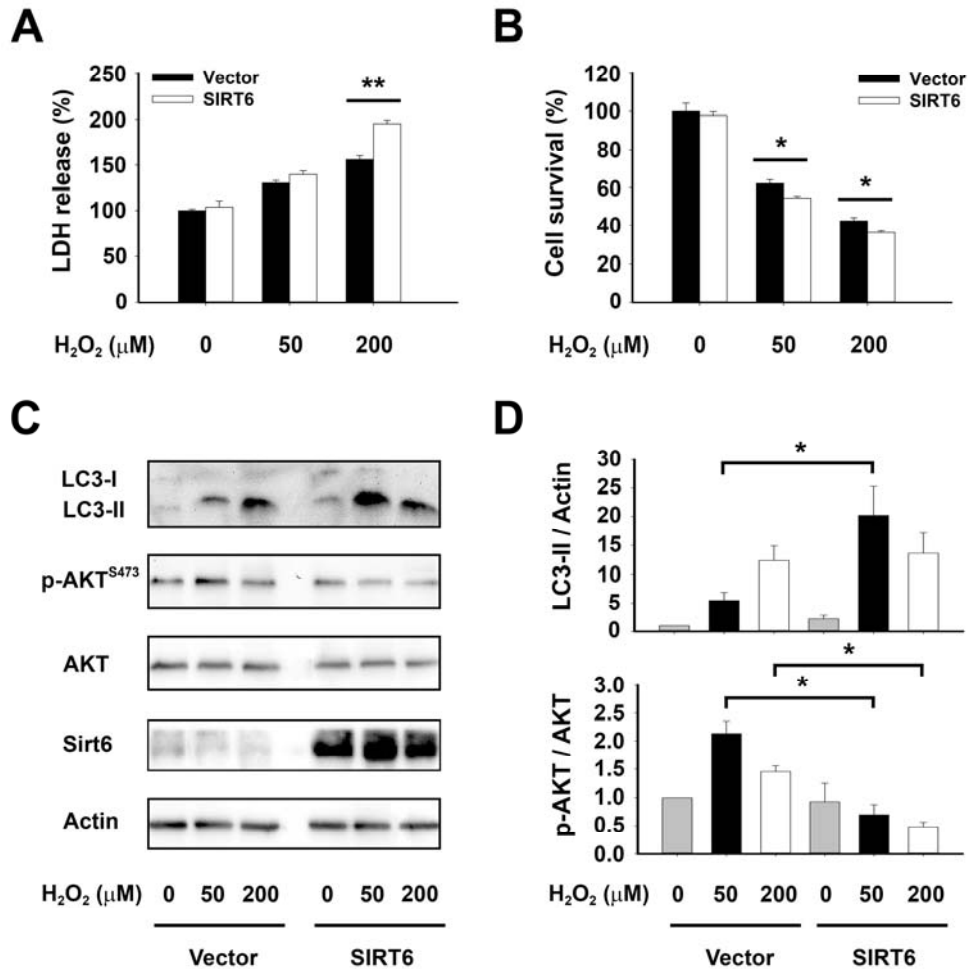

**Fig S1.** SIRT6 enhances H<sub>2</sub>O<sub>2</sub>-induced cell death through induction of autophagy in PC12 cells. (A and B) PC12 cells were exposed to H<sub>2</sub>O<sub>2</sub> for 1 h and then cultured for 24 h after transfection with SIRT6 plasmid. Cell death was assessed by LDH release assay and cell viability was assessed by CCK-8 assay. (C and D) PC12 cells were exposed to H<sub>2</sub>O<sub>2</sub> for 1 h and then cultured for 24 h after transfection with SIRT6 plasmid. LC3 and phosphorylated AKT levels were analyzed by western blot and quantified. Bars represent the mean ± SEM from at least three independent experiments. \*P<0.05, \*\*P<0.01.

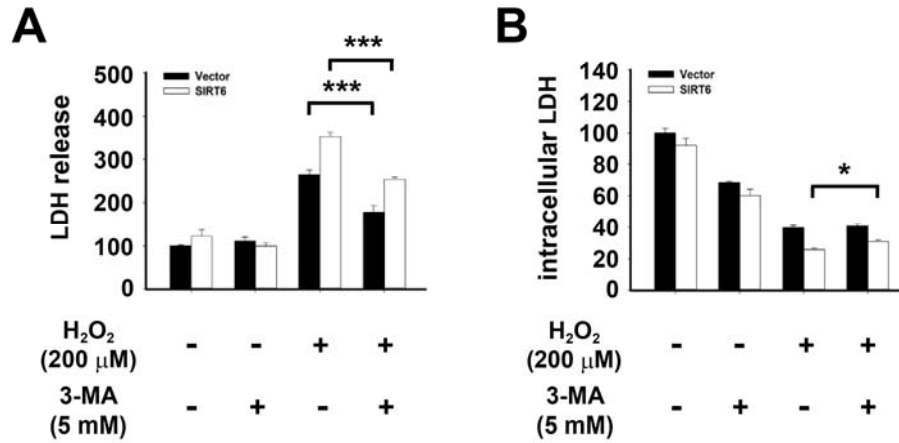

**Fig S2.** Inhibition of autophagy reduces H<sub>2</sub>O<sub>2</sub>-induced neuronal damage. (A and B) SH-SY5Y cells were pretreated with H<sub>2</sub>O<sub>2</sub> for 1 h and then incubated with 3-MA for 24 h. Cell death and viability were assessed by LDH assay. Bars represent the mean ± SEM from at least three independent experiments. \*P<0.05; \*\*\*P<0.001.

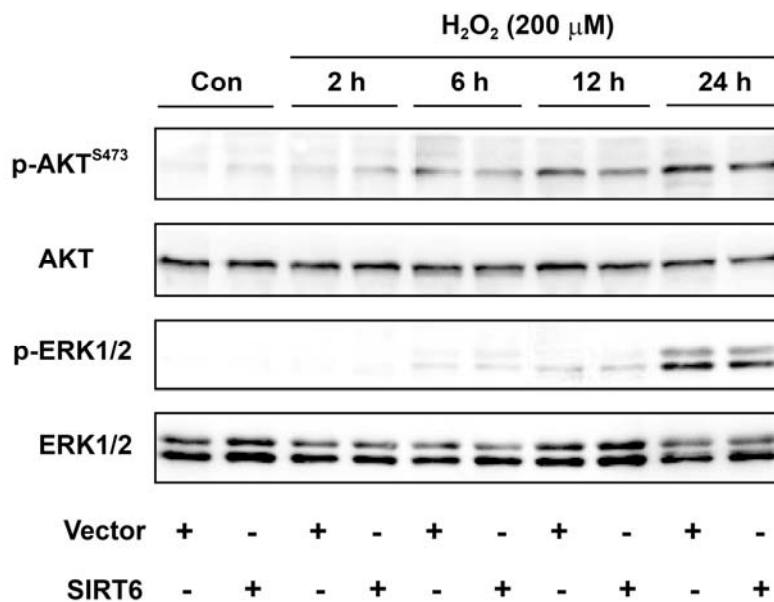

**Fig S3.** H<sub>2</sub>O<sub>2</sub> treatment causes AKT and ERK MAPK activation. SH-SY5Y cells were pretreated with H<sub>2</sub>O<sub>2</sub> for 1 h and then cultured for indicated time. Levels of phosphorylated AKT and ERK were analyzed by western blot.

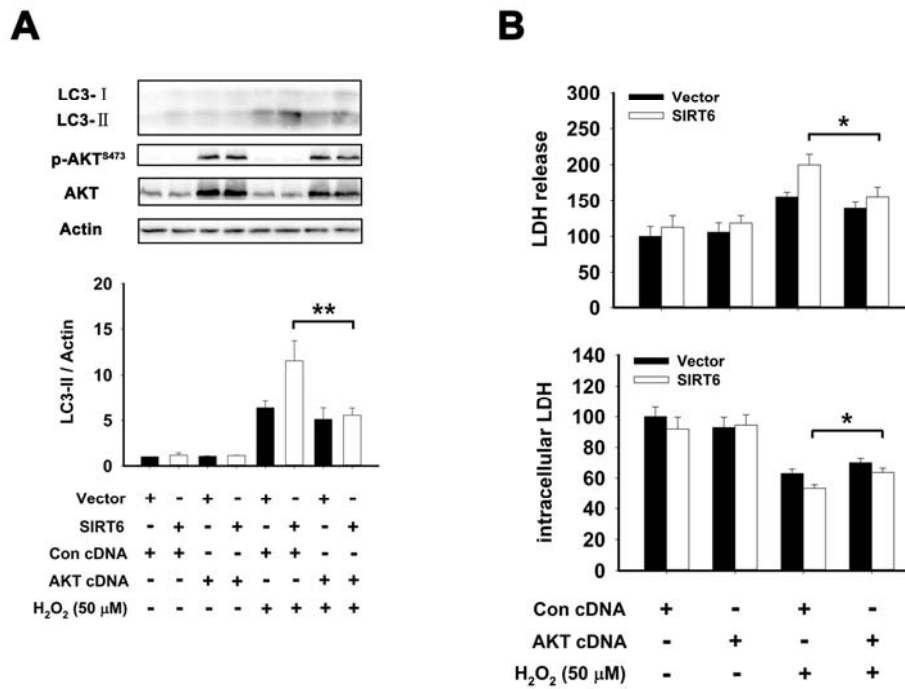

**Fig S4.** Activation of AKT signaling attenuates SIRT6-mediated autophagy and neuronal damage following lower concentration of H<sub>2</sub>O<sub>2</sub> treatment. (A) SH-SY5Y cells were exposed to 50 μM H<sub>2</sub>O<sub>2</sub> for 1 h and then cultured for 24 h after transfection with MYR-AKT plasmid. LC3 level was analyzed by western blot and quantified. (B) SH-SY5Y cells were exposed to 50 μM H<sub>2</sub>O<sub>2</sub> for 1 h and then cultured for 24 h after transfection with MYR-AKT plasmid. Cell death and viability were assessed by LDH assay. Bars represent the mean ± SEM from at least three independent experiments. \*P<0.05; \*\*P<0.01.
